# Supplementary material
Source: HighWire-hosted journal article supplement (https://www.annfammed.org/highwire/filestream/8332/field_highwire_adjunct_files/1/Driscoll_Supp_Figures_1-3.pdf)
Supplement: Driscoll_Supp_Figures_1-3.pdf [file Driscoll_Supp_Figures_1-3.pdf]

## Online Supplementary Material

Driscoll DL, Hiratsuka V, Johnston JM, et al. Process and outcomes of patient-centered medical care with Alaska Native People at Southcentral Foundation. *Ann Fam Med*. 2013;11(Suppl\_1):S41-S49.

[http://www.annfammed.org/content/11/Suppl\\_1/S41](http://www.annfammed.org/content/11/Suppl_1/S41)

### Supplemental Figure 1. Monthly emergency care use overall.

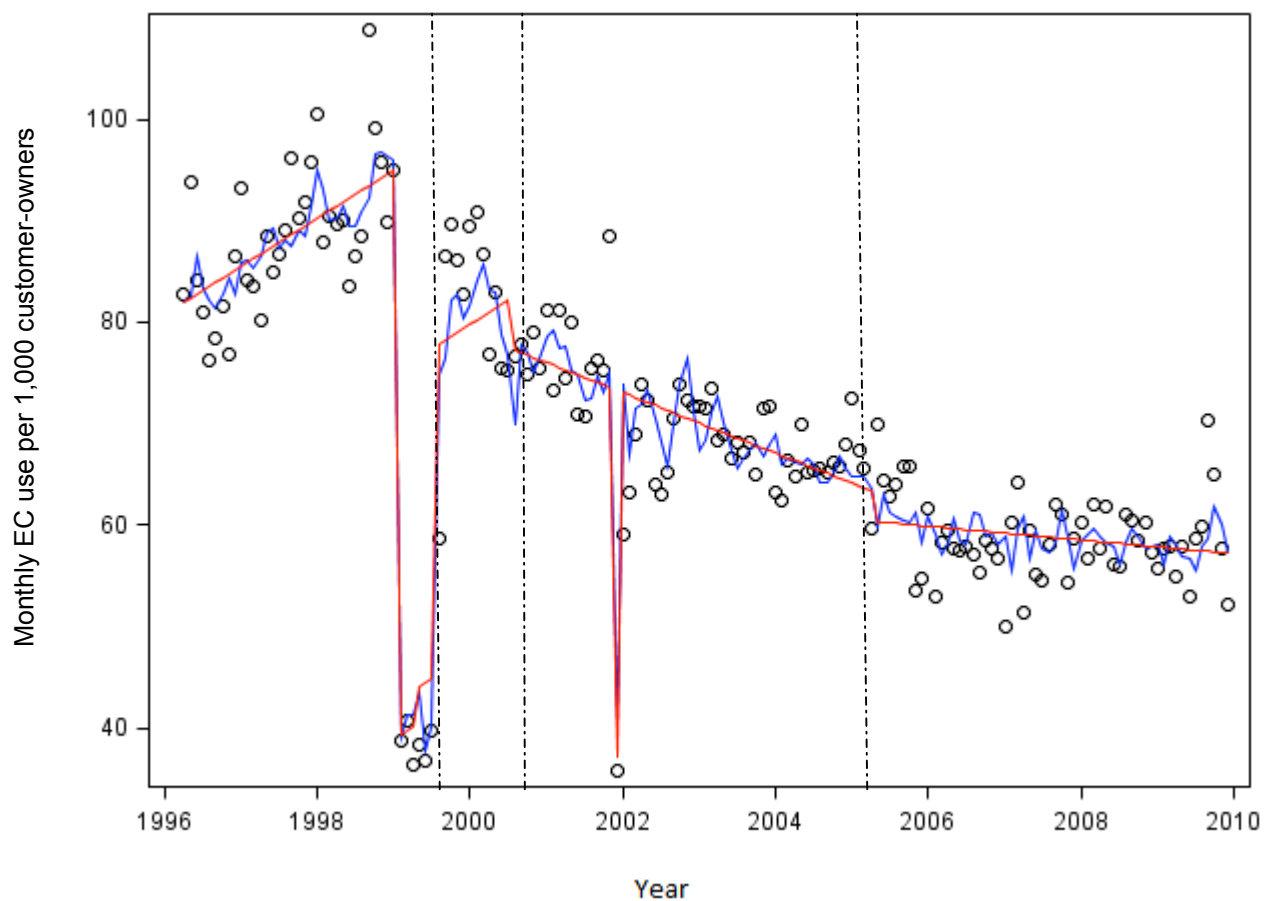

- Monthly rate extracted from RPMS.
- Inner product of estimated coefficients and independent variables.
- Predicted value including autoregressive components.

EC = emergency care; RPMS = Resource and Patient Management System.

**Supplemental Figure 2. Bimonthly emergency care use for asthma (primary or secondary diagnosis).**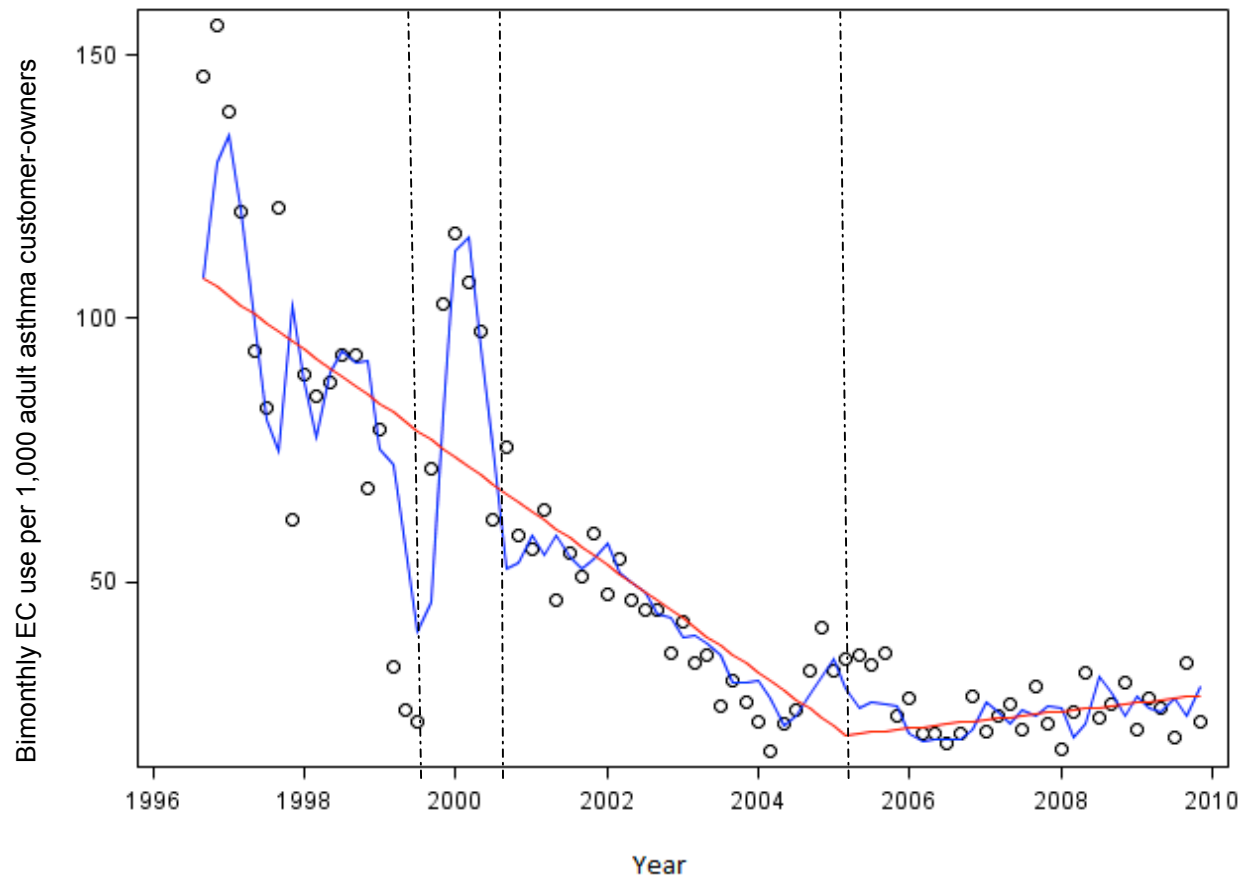

- Bimonthly rate extracted from RPMS.
- Inner product of estimated coefficients and independent variables.
- Predicted value including autoregressive components.

EC = emergency care; RPMS = Resource and Patient Management System.

**Supplemental Figure 3. Monthly emergency care use for unintentional injuries.**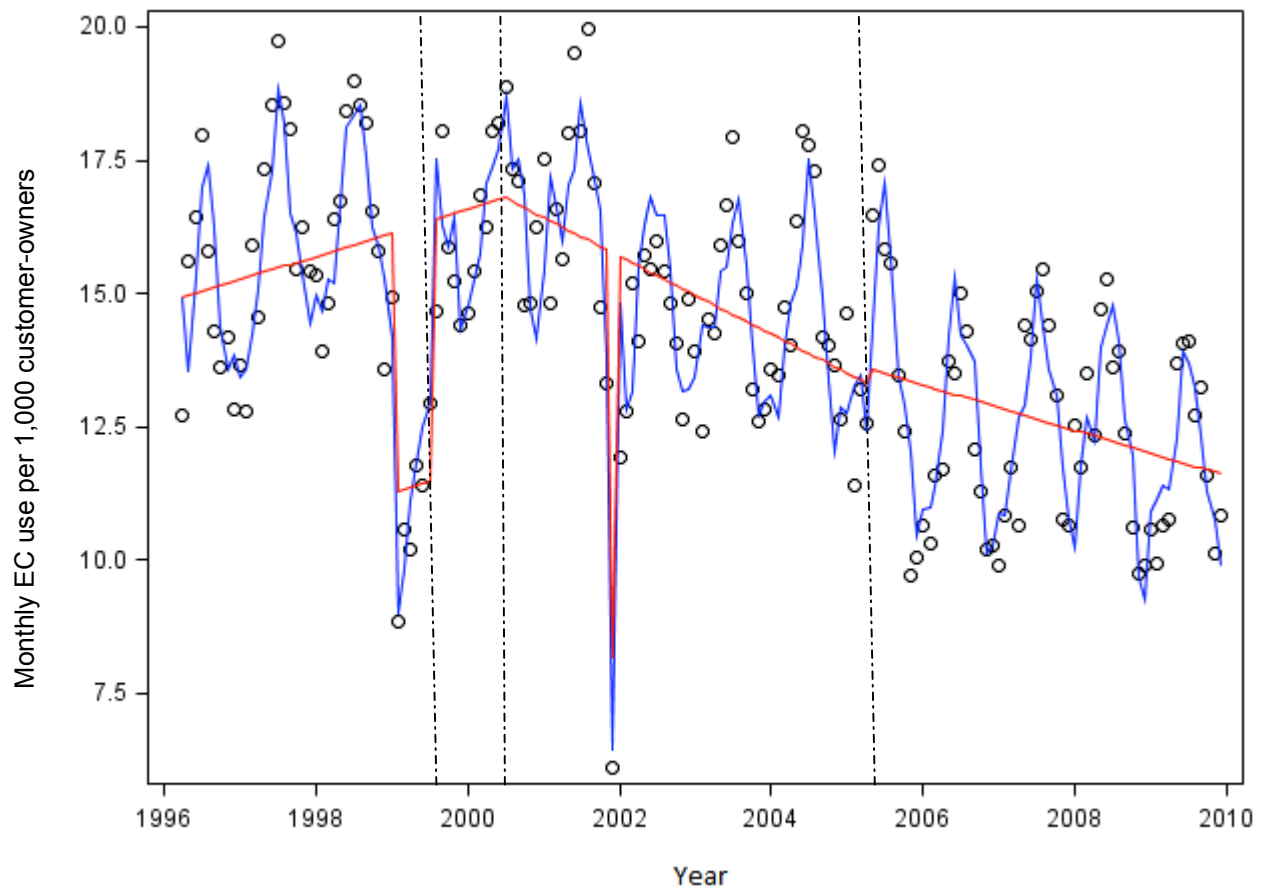

- Monthly rate extracted from RPMS.
- Inner product of estimated coefficients and independent variables.
- Predicted value including autoregressive components.

EC = emergency care; RPMS = Resource and Patient Management System.
